# Supplementary material
Source: PubMed Central journal article supplement (PMC10592529)

## SUPPORTING INFORMATION

**Figure S1.** (A) Initial hits were classified into three classes: antifungals, antibacterials, and antivirals. (B) Venn diagram showing initial hits active against either or both *C. albicans* SC5314 and *C. auris* 0390

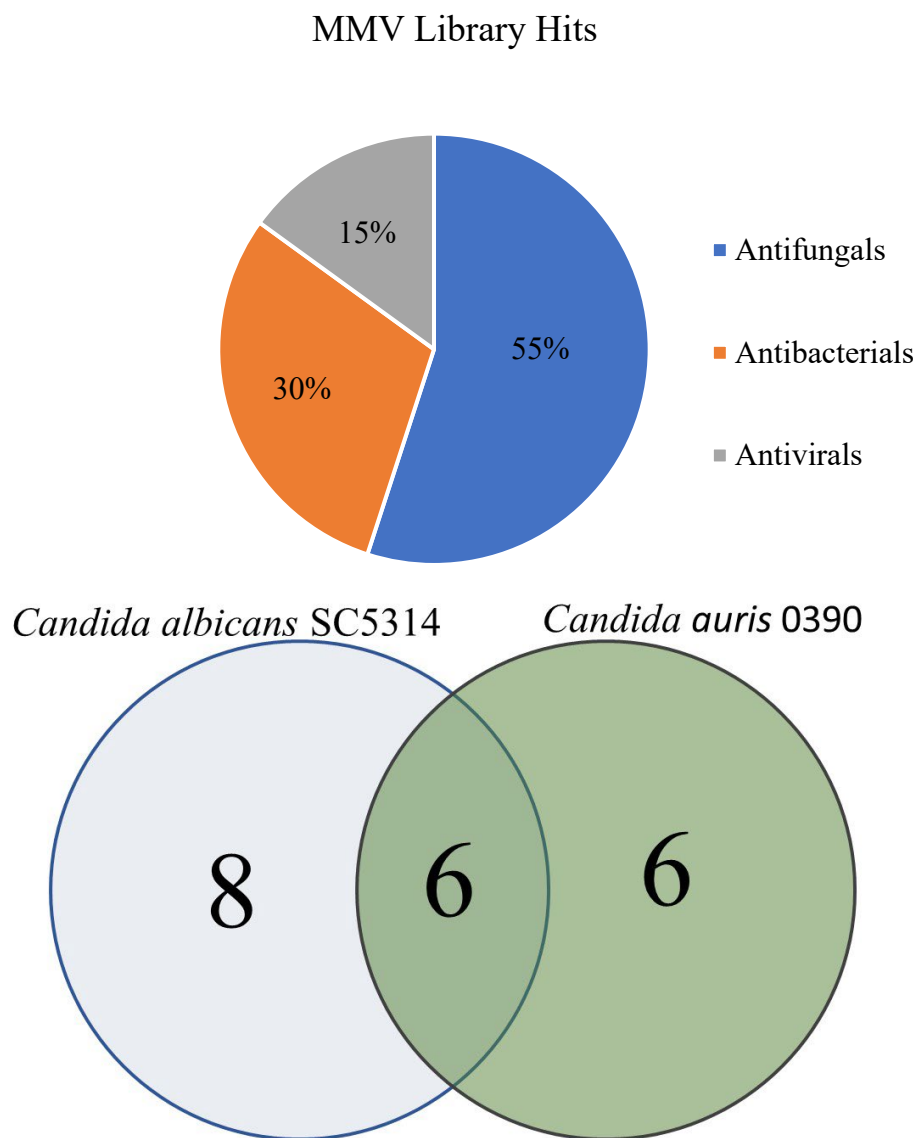

**Table S1.** Structure and chemical information of the leading repositionable compounds everolimus, MMV1633966 and MMV1593537.

|                       | Everolimus                                                                                                                                                                                                                                                                                                    | MMV1633966                                                                            | MMV1593537                                                                          |
|-----------------------|---------------------------------------------------------------------------------------------------------------------------------------------------------------------------------------------------------------------------------------------------------------------------------------------------------------|---------------------------------------------------------------------------------------|-------------------------------------------------------------------------------------|
| MMV ID                | 639951                                                                                                                                                                                                                                                                                                        | 1633966                                                                               | 1593537                                                                             |
| STRUCTURE             | 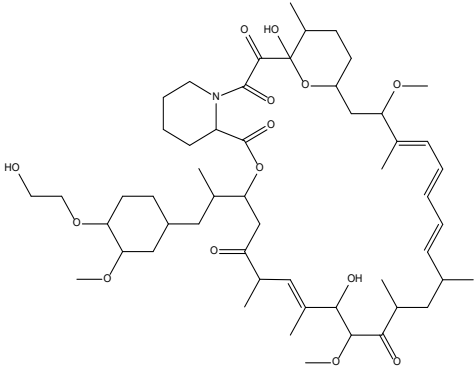                                                                                                                                                                                                                             |     |  |
| CHEMICAL NAME         | rac (1S,9R,12R,15S,16E,18S,19S,21S,23R,24E,26E,28E,30R,32R,35S)-1,18-dihydroxy-19,30-dimethoxy-15,17,21,23,29,35-hexamethyl-12-[rac-(2S)-1-[rac-(1R,3S,4S)-4-(2-hydroxyethoxy)-3-methoxycyclohexyl]propan-2-yl]-11,36-dioxa-4-azatricyclo[30.3.1.04,9]hexatriaconta-16,24,26,28-tetraene-2,3,10,14,20-pentone | 1-[2-[(2,10-dichloro-5,7-dihydroindolo[2,3-b]carbazol-6-yl)oxy]ethyl]tetrazol-5-amine | 3-[4,5-bis(4-fluorophenyl)-1H-imidazol-2-yl]-5-bromo-1H-indole                      |
| FORMULA               | C <sub>53</sub> H <sub>83</sub> N O <sub>14</sub>                                                                                                                                                                                                                                                             | C <sub>21</sub> H <sub>15</sub> Cl <sub>2</sub> N <sub>7</sub> O                      | C <sub>23</sub> H <sub>14</sub> Br F <sub>2</sub> N <sub>3</sub>                    |
| MOLECULAR WEIGHT (DA) | 958.2                                                                                                                                                                                                                                                                                                         | 452.3                                                                                 | 450.3                                                                               |
| DISEASE AREA          | Antivirals                                                                                                                                                                                                                                                                                                    | Antibacterials                                                                        | Antibacterials                                                                      |

**Table S2.** MIC values of MMV1633966 and MMV1593537 after exposure to planktonic forms of medically important yeast and filamentous fungi. FLZ, fluconazole; VRZ, voriconazole; PSZ, Posaconazole.

| Species/FTL number                  | MMV1633966 |      | MMV1593537 |      | FLZ    | VRZ  | PSZ  |
|-------------------------------------|------------|------|------------|------|--------|------|------|
|                                     | 50%        | 100% | 50%        | 100% | 50%    | 100% | 100% |
| <i>C. parapsilosis</i><br>ATCC22019 | 1          | 2    | 2          | 2    | 1      | ---  | ---  |
| <i>C. albicans</i><br>ATCC 90028    | 1          | 1    | 2          | 2    | ≤0.125 | ---  | ---  |
| <i>C. auris</i><br>Cau-1            | 1          | 1    | 2          | 2    | >64    | ---  | ---  |
| <i>C. glabrata</i><br>Cg-2          | 1          | 1    | 2          | 2    | 4      | ---  | ---  |
| <i>Cr. neoformans</i><br>Crn-2      | 1          | >16  | 2          | 2    | 4      | ---  | ---  |
| <i>P. variotii</i><br>MYA-3630      | ---        | ---  | ---        | ---  | ---    | ---  | ---  |
| <i>Rhizopus sp.</i><br>Rh-1         | >16        | >16  | >16        | >16  | ---    | ---  | 1    |
| <i>A. fumigatus</i><br>AF293        | >16        | >16  | 16         | >16  | ---    | 0.5  | ---  |
| <i>Fusarium sp</i><br>Fs-3          | >16        | >16  | >16        | >16  | ---    | >16  | ---  |

**Figure S2.** Cytotoxicities of the MMV1633966 (MMV1) and MMV1593537 (MMV2) compounds. Cytotoxicity was measured using a human hepatocellular carcinoma (HepG2) cell line. For each compound, the concentration that reduced cell viability by 50% ( $CC_{50}$ ) was calculated based on these assays.

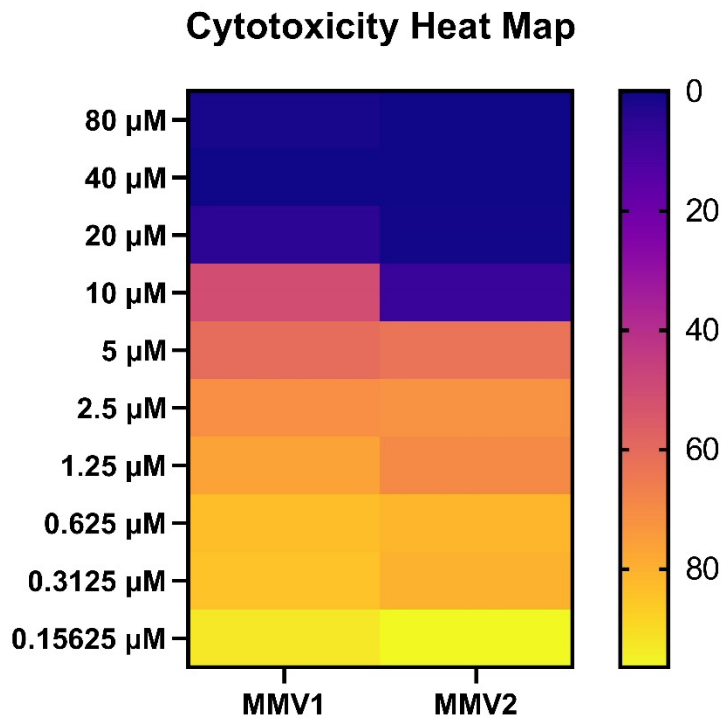





**Figure S5.** Activity of everolimus against mature biofilms formed by different clinical isolates of *C. auris*.

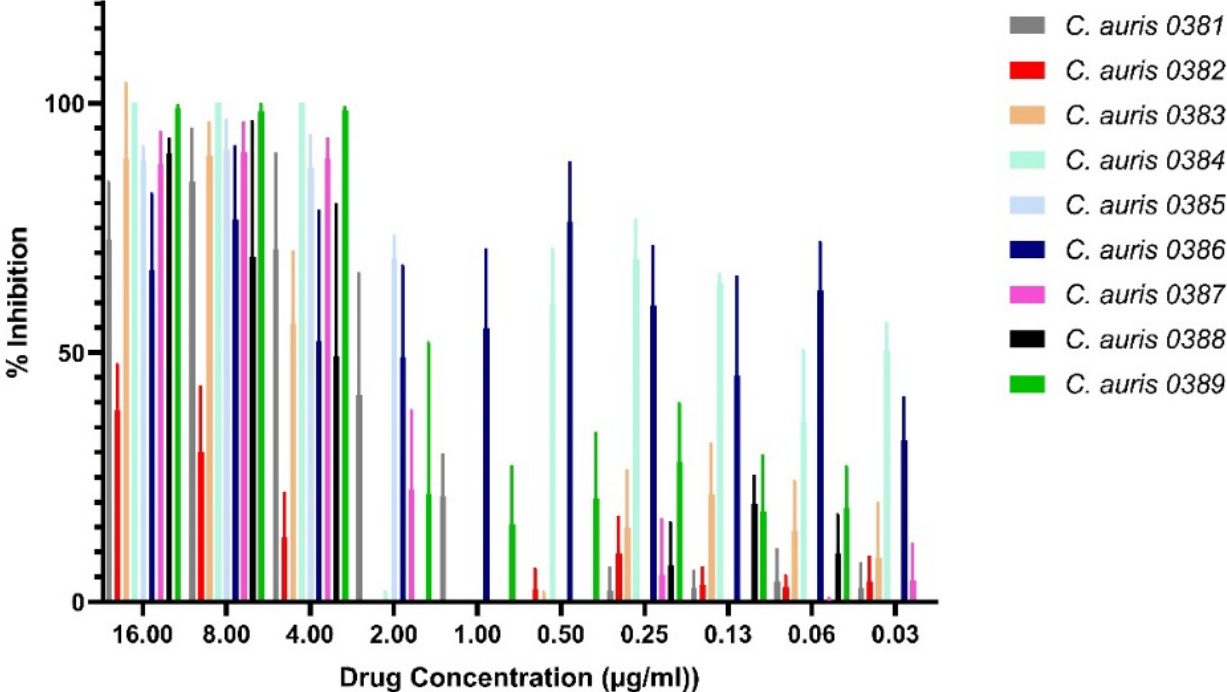

Supplement: NIHMS1908349-supplement-Supinfo.pdf [file NIHMS1908349-supplement-Supinfo.pdf]
